# Supplementary material for: CD56 regulates human NK cell cytotoxicity through Pyk2
Source: eLife journal article supplement (doi:10.7554/elife.57346), 2020-06-08
Supplement: supp1 [file elife-57346-supp1-v2.pdf]

| <b>Key Resources Table</b>                |                                                |                                  |                                   |                                                                                                                   |
|-------------------------------------------|------------------------------------------------|----------------------------------|-----------------------------------|-------------------------------------------------------------------------------------------------------------------|
| <b>Reagent type (species) or resource</b> | <b>Designation</b>                             | <b>Source or reference</b>       | <b>Identifiers</b>                | <b>Additional information</b>                                                                                     |
| gene ( <i>Homo sapiens</i> )              | NCAM1                                          | NCBI                             | NM_000615                         |                                                                                                                   |
| cell line ( <i>Homo sapiens</i> )         | NK92                                           | American Type Culture Collection | Cat # CRL-2407;<br>RRID:CVCL_2142 |                                                                                                                   |
| cell line ( <i>Homo sapiens</i> )         | YTS                                            | PMID:1040364<br>1                | RRID:CVCL_D324                    | Dr. J. Orange (Columbia University); subline of YT originally derived in Dr. J. Strominger's lab                  |
| cell line ( <i>Homo sapiens</i> )         | NK92 CD56-KO                                   | PMID:27435370                    |                                   |                                                                                                                   |
| cell line ( <i>Homo sapiens</i> )         | NK92 CD56-KO<br>NCAM140-mApple                 | This paper                       | NM_000615                         | Dr. E. Mace (Columbia University); NK92 cell line with re-expression of full-length NCAM140                       |
| cell line ( <i>Homo sapiens</i> )         | NK92 CD56-KO<br>NCAM140-mApple<br>$\Delta$ ECD | This paper                       |                                   | Dr. E. Mace (Columbia University); NK92 cell line with re-expression of NCAM140 with extracellular domain deleted |

|                                           |                                     |                                                        |                                                |                                                                                                                   |
|-------------------------------------------|-------------------------------------|--------------------------------------------------------|------------------------------------------------|-------------------------------------------------------------------------------------------------------------------|
| cell line ( <i>Homo sapiens</i> )         | NK92 CD56-KO<br>NCAM140-mApple ΔICD | This paper                                             |                                                | Dr. E. Mace (Columbia University); NK92 cell line with re-expression of NCAM140 with intracellular domain deleted |
| cell line ( <i>Homo sapiens</i> )         | YTS CD56-KO                         | This paper                                             |                                                | Dr. E. Mace (Columbia University); YTS cell line with CD56 deleted                                                |
| cell line ( <i>Homo sapiens</i> )         | 721.221                             | PMID:3257565                                           | RRID:CVCL_6263                                 | Dr. J. Orange (Columbia University)                                                                               |
| cell line ( <i>Homo sapiens</i> )         | K562                                | PMID:163658                                            | RRID:CVCL_0004                                 | Dr. J. Orange (Columbia University)                                                                               |
| cell line ( <i>Homo sapiens</i> )         | KT86                                | PMID:17785506                                          |                                                | Dr. J. Orange (Columbia University); K562 expressing CD86                                                         |
| cell line ( <i>Homo sapiens</i> )         | Phoenix                             | American Type Culture Collection                       | Cat #:CRL-3213;<br>RRID:CVCL_H716              |                                                                                                                   |
| cell line ( <i>Homo sapiens</i> )         | Raji                                | PMID:14304234                                          | RRID:CVCL_0511                                 | Dr. J. Orange (Columbia University)                                                                               |
| cell line ( <i>Homo sapiens</i> )         | Jurkat                              | American Type Culture Collection                       | Clone E6-1;<br>Cat#:TIB-152;<br>RRID:CVCL_0367 |                                                                                                                   |
| Biological sample ( <i>Homo sapiens</i> ) | Peripheral blood                    | Columbia University IRB AAAR7377;<br>Baylor College of | Deidentified                                   |                                                                                                                   |

|                                              |                                               |                                          |                                                      |                                                                                       |
|----------------------------------------------|-----------------------------------------------|------------------------------------------|------------------------------------------------------|---------------------------------------------------------------------------------------|
|                                              |                                               | Medicine IRB<br>H30487                   |                                                      |                                                                                       |
| Biological sample<br>( <i>Homo sapiens</i> ) | Leuko-reduction system (LRS) chambers         | Mississippi Valley Regional Blood Center | Deidentified                                         |                                                                                       |
| recombinant DNA reagent                      | U6gRNA-Cas9-2A-GFP (plasmid)                  | Sigma-Aldrich                            | Cat#: CAS9GFPP;<br>Guide:CGCTGATC<br>TCCCCTGGCTGG    | CD56 targeting CRISPR plasmid                                                         |
| recombinant DNA reagent                      | CD56 (NCAM1) Human ORF clone                  | Origene                                  | Cat#:RG213470;<br>NM_000615,<br>transcript variant 1 | For subcloning to generate pBABE-puro-NCAM-mApple                                     |
| recombinant DNA reagent                      | pBABE-puro-NCAM140 mApple (plasmid)           | This paper                               |                                                      | Produced by Epoch Life Sciences Inc. Available from Dr. E. Mace (Columbia University) |
| recombinant DNA reagent                      | pBABE-puro-NCAM140 ΔECD mApple (plasmid)      | This paper                               |                                                      | Produced by Epoch Life Sciences Inc. Available from Dr. E. Mace (Columbia University) |
| recombinant DNA reagent                      | pBABE-puro-NCAM140 ΔICD mApple (plasmid)      | This paper                               |                                                      | Produced by Epoch Life Sciences Inc. Available from Dr. E. Mace (Columbia University) |
| antibody                                     | Anti-CD56 (mouse monoclonal; Alexa Fluor 647) | Biologend                                | Clone HCD56;<br>Cat# 318314,<br>RRID:AB_604103       | IF (1:100)                                                                            |
| antibody                                     | Anti-CD56 (mouse monoclonal; BV605)           | Biologend                                | Clone HCD56;<br>Cat# 318334,<br>RRID:AB_2561912      | FC (1:200)                                                                            |

|          |                                                            |                              |                                                  |                          |
|----------|------------------------------------------------------------|------------------------------|--------------------------------------------------|--------------------------|
| antibody | Anti-CD56<br>(mouse<br>monoclonal;<br>BV421)               | Biologend                    | Clone HCD56;<br>Cat#:318328;<br>RRID:AB_11218798 | FC (1:100)               |
| antibody | CD56 (mouse<br>monoclonal;<br>unconjugated)                | Cell Signaling<br>Technology | Clone:123C3;<br>Cat#:3576S;<br>RRID:AB_2149540   | WB (1:1000)              |
| antibody | Actin (rabbit<br>polyclonal)                               | Sigma                        | Cat#:A2066<br>RRID:AB_476693                     | WB (1:4000)              |
| antibody | RDye 680RD<br>Goat anti-Mouse<br>IgG                       | LiCOR<br>Biosciences         | 925-68070;<br>RRID:AB_2651128                    | WB (1:10,000)            |
| antibody | IRDye 800CW<br>Goat anti-Rabbit<br>IgG                     | LiCOR<br>Biosciences         | Cat#:926-32211;<br>RRID:AB_621843                | WB (1:10,000)            |
| antibody | Pyk2 phospho<br>Y402 (rabbit<br>polyclonal)                | Abcam                        | Cat#:ab4800;<br>RRID:AB_2173988                  | IF (1:100), FC<br>(1:50) |
| antibody | PSA-NCAM<br>(rat<br>monoclonal)                            | BD<br>Biosciences            | Clone:12F8;<br>Cat#:556325;<br>RRID:AB_396363    | FC (1:50)                |
| antibody | Goat anti-Rat<br>IgG (H+L)<br>Secondary<br>Antibody (FITC) | Thermo                       | Cat#:31629<br>RRID:AB_228240                     | FC (1:100)               |
| antibody | PSA-NCAM<br>(mouse<br>monoclonal,<br>unconjugated)         | Millipore                    | Clone 2-2B;<br>Cat#MAB5324;<br>RRID:AB_95211     | WB (1:1000)              |

|          |                                           |                                       |                                               |                                                    |
|----------|-------------------------------------------|---------------------------------------|-----------------------------------------------|----------------------------------------------------|
| antibody | CD18 (mouse monoclonal, unconjugated)     | Produced from hybridoma; PMID:3594570 | Clone:IB4; RRID:CVCL_0339                     | Cross-linking for activation on glass (10 µg/ml)   |
| antibody | NKp30 (mouse monoclonal, unconjugated)    | Biologend                             | Clone:P30-15; Cat#:325202; RRID:AB_756106     | Cross-linking for activation on glass (10 µg/ml)   |
| antibody | Mouse IgG1ak                              | Biologend                             | Clone:MG1-45; Cat#:401402; RRID:AB_2801451    | Isotype control for activation on glass (10 µg/ml) |
| antibody | CD55 (mouse monoclonal; PE)               | Biologend                             | Clone:JS11; Cat#:311308; RRID:AB_314865       | FC (1:100)                                         |
| antibody | NKG2A (mouse monoclonal; Alexa Fluor 700) | R&D Biosystems                        | Clone:131411; Cat# FAB1059N; RRID:AB_10972129 | FC (1:50)                                          |
| antibody | CD20 (mouse monoclonal; BV421)            | Biologend                             | Clone:2H7; Cat#:302330; RRID:AB_10965543      | FC (1:50)                                          |
| antibody | CD244 (mouse monoclonal; FITC)            | BD Biosciences                        | Clone 2-69; Cat# 550815; RRID:AB_393900       | FC (1:10)                                          |
| antibody | CD158d (mouse monoclonal; APC)            | R&D Biosystems                        | Clone 179315; Cat#:FAB1847A RRID:AB_2130821   | FC (1:25)                                          |
| antibody | CD122 (mouse monoclonal; PE)              | Biologend                             | Clone TU27; Cat #:339006; RRID:AB_2248892     | FC (1:10)                                          |
| antibody | CD94 (mouse monoclonal; APC)              | Biologend                             | Clone DX22; Cat#:305508 RRID:AB_2133129       | FC (1:50)                                          |
| antibody | CD45 (mouse monoclonal;)                  | Beckman Coulter                       | Clone J.33; Cat#: B36294; RRID:AB_2833027     | FC (1:20)                                          |

|          |                                                         |                |                                             |             |
|----------|---------------------------------------------------------|----------------|---------------------------------------------|-------------|
|          | Krome Orange)                                           |                |                                             |             |
| antibody | CD28 (mouse monoclonal; PE                              | BD Biosciences | Clone L293; Cat #:348047; RRID:AB_400368    | FC (1:10)   |
| antibody | CD18 (mouse monoclonal; APC)                            | BD Biosciences | Clone:6.7; Cat#:551060; RRID:AB_398485      | FC (1:10)   |
| antibody | CD11a (mouse monoclonal; PE Cy7)                        | BD Biosciences | Clone HI111; Cat#:561387; RRID:AB_2130821   | FC (1:50)   |
| antibody | CD2 (mouse monoclonal; Pacific Blue)                    | Beckman        | Clone 39C1.5; Cat#:B09685; RRID:AB_2847880  | FC (1:20)   |
| antibody | Granzyme B (mouse monoclonal; PE Texas Red)             | Thermo         | Clone GB11; Cat#:GRB17 RRID:AB_1500187      | FC (1:40)   |
| antibody | Granzyme A (mouse monoclonal; Alexa Fluor 647)          | Biologend      | Clone:CB9; Cat#:507214; RRID:AB_2114395     | FC (1:40)   |
| antibody | CD107a (LAMP-1) (mouse monoclonal; PE-Cy5)              | Thermo         | Clone:H4A3; Cat#:15-1079-42; RRID:AB_657557 | FC (1:40)   |
| antibody | Perforin (mouse monoclonal; FITC)                       | Biologend      | Clone:dG9; Cat#:308104; RRID:AB_314702      | FC (1:12.5) |
| antibody | Interferon $\gamma$ (mouse monoclonal; Alexa Fluor 700) | Biologend      | Clone:4S.B3; Cat#:502520; RRID:AB_528921    | FC (1:33)   |
| antibody | Perforin (mouse monoclonal; Alexa Fluor 488)            | Biologend      | Clone:dG9; Cat#:308108; RRID:AB_493252      | IF (1:50)   |

|                              |                                                                |                     |                                                    |                                                                  |
|------------------------------|----------------------------------------------------------------|---------------------|----------------------------------------------------|------------------------------------------------------------------|
| antibody                     | Tubulin (mouse monoclonal; biotin)                             | Thermo              | Clone:236-10501;<br>Cat#A21371;<br>RRID:AB_2535843 | IF (1:20)                                                        |
| antibody                     | Goat anti-rabbit IgG Alexa Fluor 488                           | Thermo              | Cat#:A-11008;<br>RRID:AB_143165                    | IF (1:100)                                                       |
| other                        | Streptavidin, Alexa Fluor 405 conjugated                       | Thermo              | Cat#:S32351                                        | IF (1:100)                                                       |
| other                        | Phalloidin, Alexa Fluor 568 conjugate                          | Thermo              | Cat#:A12380                                        | IF (1:100)                                                       |
| Peptide, recombinant protein | Recombinant human IL-15                                        | Peprotech           | Cat#:200-15                                        | Cell culture (3-5 ng/ml)                                         |
| Peptide, recombinant protein | Human IL-2                                                     | Sigma               | Cat#:11147528001                                   | <sup>51</sup> Cr assays (1000 U/ml); NK92 maintenance (100 U/ml) |
| sequence-based reagent       | CD56 gRNA                                                      | IDT                 | CGCUGAUCUCCC<br>CCUGGCU                            | For primary cells                                                |
| commercial assay or kit      | IFN $\gamma$ ELISA                                             | Abcam               | Cat#:ab46025                                       |                                                                  |
| chemical compound, drug      | PF431396                                                       | Tocris              | Cat#:4278                                          | Pyk2 inhibitor                                                   |
| chemical compound, drug      | Cr51                                                           | Perkin Elmer        | Cat#:<br>NEZ030S005MC                              |                                                                  |
| chemical compound, drug      | Peptide N-glycosylase (PNGase F)                               | New England Biolabs | Cat#:P0704S                                        | FC (1 U/ml)                                                      |
| chemical compound, drug      | Phospholipase C protein, phosphatidylinositol specific (PIPLC) | Thermo              | Cat#:P6466                                         |                                                                  |

|                        |                      |                      |                 |  |
|------------------------|----------------------|----------------------|-----------------|--|
| software,<br>algorithm | Fiji                 | PMID:22743772        | RRID:SCR_002285 |  |
| software,<br>algorithm | Imaris               | Bitplane             | RRID:SCR_007370 |  |
| software,<br>algorithm | Image Studio<br>Lite | Licor                | RRID:SCR_013715 |  |
| software,<br>algorithm | Prism 8.0            | GraphPad<br>Software | RRID:SCR_002798 |  |
| software,<br>algorithm | Flowjo               | BD<br>Biosciences    | RRID:SCR_008520 |  |

FC: flow cytometry, WB: Western blotting, IF: immunofluorescence
